# Supplementary material for: CSL controls telomere maintenance and genome stability in human dermal fibroblasts
Source: PubMed Central journal article supplement (PMC6715699; doi:10.1038/s41467-019-11785-7), 2019-08-29
Supplement: 41467_2019_11785_MOESM6_ESM.pdf [file 41467_2019_11785_MOESM6_ESM.pdf]

### Supplementary Data 3. List of cell strains and identifiers.

| <b>Data S3.</b>                             |         |                |
|---------------------------------------------|---------|----------------|
| <b>List of cell strains and identifiers</b> |         |                |
| Cell type                                   | Species | Name           |
| Primary dermal fibroblasts                  | Human   | GB1            |
| Primary dermal fibroblasts                  | Human   | GB2            |
| Primary dermal fibroblasts                  | Human   | GB3            |
| Primary dermal fibroblasts                  | Human   | GB4            |
| Primary dermal fibroblasts                  | Human   | AT1            |
| Primary dermal fibroblasts                  | Human   | AT2            |
| Primary dermal fibroblasts                  | Human   | AT3            |
| Primary dermal fibroblasts                  | Human   | GP1            |
| Primary dermal fibroblasts                  | Human   | SJ1            |
| Primary dermal fibroblasts                  | Human   | SG1            |
| Primary dermal fibroblasts                  | Mouse   | M-AT1          |
| Primary dermal fibroblasts                  | Mouse   | M-AT2          |
| Primary dermal fibroblasts                  | Mouse   | M-AT3          |
| Primary dermal fibroblasts                  | Mouse   | M-AT4          |
| Primary dermal fibroblasts                  | Mouse   | M-AT5          |
| Primary dermal fibroblasts                  | Mouse   | M-AT6          |
| Cancer associated fibroblasts               | Human   | CAF1           |
| Cancer associated fibroblasts               | Human   | CAF2           |
| Cancer associated fibroblasts               | Human   | CAF11          |
| Cancer associated fibroblasts               | Human   | CAF12          |
| Cancer associated fibroblasts               | Human   | CAF13          |
| Cancer associated fibroblasts               | Human   | CAF14          |
| Cancer associated fibroblasts               | Human   | CAF15          |
| Cancer associated fibroblasts               | Human   | CAF16          |
| Matched dermal fibroblasts                  | Human   | HDF11          |
| Matched dermal fibroblasts                  | Human   | HDF12          |
| Matched dermal fibroblasts                  | Human   | HDF13          |
| Matched dermal fibroblasts                  | Human   | HDF14          |
| Matched dermal fibroblasts                  | Human   | HDF15          |
| Matched dermal fibroblasts                  | Human   | HDF16          |
| HEK 293T                                    | Human   | RRID:CVCL_0063 |
