# Supplementary material for: CSL controls telomere maintenance and genome stability in human dermal fibroblasts
Source: PubMed Central journal article supplement (PMC6715699; doi:10.1038/s41467-019-11785-7), 2019-08-29
Supplement: 41467_2019_11785_MOESM7_ESM.pdf [file 41467_2019_11785_MOESM7_ESM.pdf]

**Supplementary Data 4. Sequence of the oligonucleotides used for qPCR experiments.**

| <b>Data S4.<br/>Sequence of the oligonucleotides used for qPCR experiments</b> |        |                                             |
|--------------------------------------------------------------------------------|--------|---------------------------------------------|
| Gene                                                                           | Primer | Sequence                                    |
| <i>ALU</i>                                                                     | F      | CTGGGCGACAGAACGAGATTCTAT                    |
|                                                                                | R      | CTCACTACTTGGTGACAGGTTCA                     |
| <i>TELO</i>                                                                    | F      | ACACTAAGGTTTTGGGTTTGGGTTTGGGTTTGGGTTAGTGT   |
|                                                                                | R      | TGTTAGGTATCCCTATCCCTATCCCTATCCCTATCCCTAACA  |
| CSL mutation R192H                                                             | F      | CAAAGGTGGCTCTGTTTAATCACCTACGATCCCAGACAGTTA  |
|                                                                                | R      | TAACTGTCTGGGATCGTAGGTGATTAACAGAGCCACCTTTG   |
| CSL mutation F235R                                                             | F      | GATGAATCAGAAGGAGAAGAACGCACAGTCCGAGATGGCTA   |
|                                                                                | R      | TAGCCATCTCGGACTGTGCGTTCTTCTCCTTCTGATTCATC   |
| CSL mutation V237R                                                             | F      | TGAATCAGAAGGAGAAGAATTCACACGCCGAGATGGCTAC    |
|                                                                                | R      | GTAGCCATCTCGGCGTGTGAATTCTTCTCCTTCTGATTCA    |
| CSL mutation A258R                                                             | F      | GTGCTCAGTTACTGGCATGCGACTCCCAAGATTGATAATT    |
|                                                                                | R      | AATTATCAATCTTGGGAGTCGCATGCCAGTAACTGAGCAC    |
| CSL mutation Q307R                                                             | F      | TGCCTTTCTCAAGAAAGAATAATTCGATTCAGGCCACTCCAT  |
|                                                                                | R      | ATGGAGTGGCCTGAAATCGAATTATTCTTTCTTGAGAAAGGCA |
