# Supplementary material for: CSL controls telomere maintenance and genome stability in human dermal fibroblasts
Source: PubMed Central journal article supplement (PMC6715699; doi:10.1038/s41467-019-11785-7), 2019-08-29
Supplement: 41467_2019_11785_MOESM8_ESM.pdf [file 41467_2019_11785_MOESM8_ESM.pdf]

**Supplementary Data 5. Identifiers for the Silencer™ oligonucleotides (Ambion and Thermofisher) used for RNA-interference experiments.**

| <b>Data S5.<br/>Identifiers for the Silencer™ oligonucleotides (Ambion and Thermofisher) used for RNA-interference experiments</b> |                 |            |
|------------------------------------------------------------------------------------------------------------------------------------|-----------------|------------|
| <b>Gene name</b>                                                                                                                   | <b>#Catalog</b> | <b>#ID</b> |
| Control                                                                                                                            | 4390846         | NA         |
| CSL siRNA #1                                                                                                                       | 4392420         | 7252       |
| CSL siRNA #2                                                                                                                       | 4392420         | 7253       |
