# Supplementary material for: CSL controls telomere maintenance and genome stability in human dermal fibroblasts
Source: PubMed Central journal article supplement (PMC6715699; doi:10.1038/s41467-019-11785-7), 2019-08-29
Supplement: 41467_2019_11785_MOESM9_ESM.pdf [file 41467_2019_11785_MOESM9_ESM.pdf]

**Supplementary Data 6. Identifiers for the shRNA sequences (Sigma) used for RNA-interference experiments.**

| <b>Data S6.</b>                                                                          |     |                                                            |
|------------------------------------------------------------------------------------------|-----|------------------------------------------------------------|
| <b>Identifiers for the shRNA sequences (Sigma) used for RNA-interference experiments</b> |     |                                                            |
| Human gene targeted                                                                      | #ID | Sequence                                                   |
| <i>CSL</i>                                                                               | #1  | CCGGGCTGGAATACAAGTTGAACAACCTCGAGTTGTTCAACTTGTATTCCAGCTTTTT |
| <i>CSL</i>                                                                               | #2  | CCGGCCCTAACGAATCAAACACAAACTCGAGTTTGTGTTTGATTTCGTTAGGGTTTTT |
| <i>TP53</i>                                                                              | #1  | GACTCCAGTGGTAATCTACTTCAAGAGAGTAGATTACACTGGAGTCTTTTT        |
| <i>UPF1</i>                                                                              | #1  | CCGGGCTGAGTTGAACTTCGAGGAACTCGAGTTCCTCGAAGTTCAACTCAGCTTTTT  |
| <i>UPF1</i>                                                                              | #2  | CCGGCCAACCCGATAAACCGATGTTCTCGAGAACATCGGTTTATCGGGTTGTTTTT   |
| <i>KU70</i>                                                                              | #1  | CCGGGAAGAGTCTACCCGACATAAGCTCGAGCTTATGTCGGGTAGACTCTTCTTTTTG |
| <i>KU70</i>                                                                              | #2  | CCGGCACATACAGAAGTGACAGCTTCTCGAGAAGCTGTCACTTCTGTATGTGTTTTTG |
| <i>KU80</i>                                                                              | #1  | CCGGAATCTAAGAGAGCTGCCATCGCTCGAGCGATGGCAGCTCTCTTAGATTTTTTTG |
| <i>KU80</i>                                                                              | #2  | CCGGCGCTTTAACAACCTCCTGAAACTCGAGTTTCAGGAAGTTGTTAAAGCGTTTTTG |
