# Supplementary material for: CSL controls telomere maintenance and genome stability in human dermal fibroblasts
Source: PubMed Central journal article supplement (PMC6715699; doi:10.1038/s41467-019-11785-7), 2019-08-29
Supplement: 41467_2019_11785_MOESM11_ESM.pdf [file 41467_2019_11785_MOESM11_ESM.pdf]

### Supplementary Data 8. List of antibodies used.

| Data S8.<br>List of antibodies used |         |                            |                                   |                  |
|-------------------------------------|---------|----------------------------|-----------------------------------|------------------|
| Target                              | Species | Company and catalog #      | Assay and dilution used           | RRID             |
| γ-H2AX                              | Rabbit  | Cell Signaling #2577       | IF (1:100), WB (1:1000)           | RRID:AB_2118010  |
| γ-Tubulin                           | Mouse   | Sigma #GTU-88              | WB (1:2000)                       | RRID:AB_477584   |
| Vimentin                            | Goat    | R&D #AF2105                | IF (1:200)                        | RRID:AB_355153   |
| Vimentin                            | Mouse   | Abcam #20346               | IF (1:200)                        | RRID:AB_445527   |
| CSL                                 | Rabbit  | Cell Signaling #5313       | WB (1:1000), IP, ChIP             | RRID:AB_2665555  |
| CD45                                | Mouse   | BioLegend #304001          | IF (1:200)                        | RRID:AB_314389   |
| CSL                                 | Mouse   | Santa Cruz #271128         | PLA (1:50), IF (1:50)             | RRID:AB_10610612 |
| UPF1                                | Rabbit  | Abcam #109363              | PLA (1:50), WB (1:1000), IP, ChIP | RRID:AB_10861979 |
| UPF1                                | Rabbit  | Sigma #HPA019587           | IF (1:100)                        | RRID:AB_1856174  |
| KU70                                | Rabbit  | GeneTex #101820            | PLA (1:50), WB (1:1000), ChIP     | RRID:AB_10731639 |
| KU80                                | Rabbit  | GeneTex #109935            | PLA (1:50), WB (1:1000), ChIP     | RRID:AB_1952614  |
| TRF1                                | Rabbit  | Chawla et al, EMBO J. 2011 | ChIP                              |                  |
| TRF2                                | Rabbit  | Chawla et al, EMBO J. 2011 | ChIP                              |                  |
| UPF1                                | Rabbit  | Chawla et al, EMBO J. 2011 | ChIP                              |                  |
| TRF1                                | Rabbit  | GeneTex #32935             | PLA (1:50)                        |                  |
| TRF2                                | Mouse   | Abcam #13579               | PLA (1:50)                        | RRID:AB_300474   |
| PDGFRα-FITC                         | Mouse   | Santa Cruz #21789          | IF (1:50)                         | RRID:AB_626904   |
| Flag M2                             | Mouse   | Sigma # F1804              | ChIP                              | RRID:AB_262044   |
| Myc-tag                             | Rabbit  | Cell Signaling #2278       | ChIP, WB (1:2000)                 | RRID:AB_490778   |
